# Supplementary material
Source: PubMed Central journal article supplement (PMC8945576)
Supplement: advancesADV2021005327-suppl1.pdf [file advancesADV2021005327-suppl1.pdf]

## **Supplemental Tables**

### **Table 1: DEGs of TAMs in contact vs TAMs not in contact or naïve BM MPs**

This Excel file contains genes, and complete GO-term analysis used for Figure 6.

### **Table 2: DEGs of TAMs not in contact vs TAMs in contact or naïve BM MPs**

This Excel file contains genes, and complete GO-term analysis used for Figure 6.

### **Table 3: DEGs of TAMs in contact and TAMs not in contact vs naïve BM MPs**

This Excel file contains genes, and complete GO-term analysis used for Figure 6.

### **Table 4: Analysis of cognate pairs of TAM ligands and MM receptor**

This Excel file contains gene analysis used for Figure 7A-B.

### **Table 5: Analysis of cognate pairs of MM ligands and TAM receptor**

This Excel file contains gene analysis used for Figure 7C-D.

## **Supplemental Movie Legends**

**Supplemental Movie 1.** Z-stack montage through a myeloma cluster using intra-vital two-photon imaging. GFP+ myeloma cells (green) are shown in context of CD169+ macrophages (red), labeled with ant-CD169 PE, administered i.v. one day prior.

**Supplemental Movie 2.** Intra-vital two-photon time-lapse imaging in the tibia. Myeloma cell (green) extends a nanotube in contact with autofluorescent macrophage (blue). During the time course, the nanotube is snapped off and taken up by the macrophages.

**Supplemental Movie 3.** Intra-vital two-photon time-lapse imaging of myeloma cells (green) pre and post rTNFa treatment.

## Supplemental Figure Legends

### Supplemental Figure 1

A-B. Analysis of CD169-DTR chimeric mice following DT treatments. A Analysis of macrophages as gated in Figure 1A, and analyzed for CD169 expression. B. Analysis of chimerism based on the spleen. C. Comparison of CD206+ and CD206- MPs on the basis of TNF $\alpha$  and IL-6 intracellular production, pair-wise comparison in matched samples. D-E Analysis of TNF $\alpha$  production in CD3+ T cells, macrophages (gated as in Figure 1A), CD11b<sup>high</sup> myeloid cells. D. Composition of TNF $\alpha$ + producing cells shown as a stacked plot. E. Comparison of TNF $\alpha$ + MPs and myeloid cells as a function of myeloma size. F. Analysis of frequency of BM macrophages as a function of tumor size.

### Supplemental Figure 2

A. Analysis of numbers of IL-6+ BM MPs from TNF $\alpha$ -deficient chimeras, shown in Figure 3I. B. rTNF $\alpha$  stimulation of BM cells from naïve and myeloma bearing mice and analysis of intracellular IL-6 and TNF $\alpha$  producing MPs ex vivo. Mann Whitney t-tests were performed. C. Gating strategy for PBS and rTNF $\alpha$  treated BM from myeloma-bearing mice, analyzed in Figure 4C. D. Gating strategy for GFP+ MPs used in sorting for RNAseq analyses in Figure 6-7.

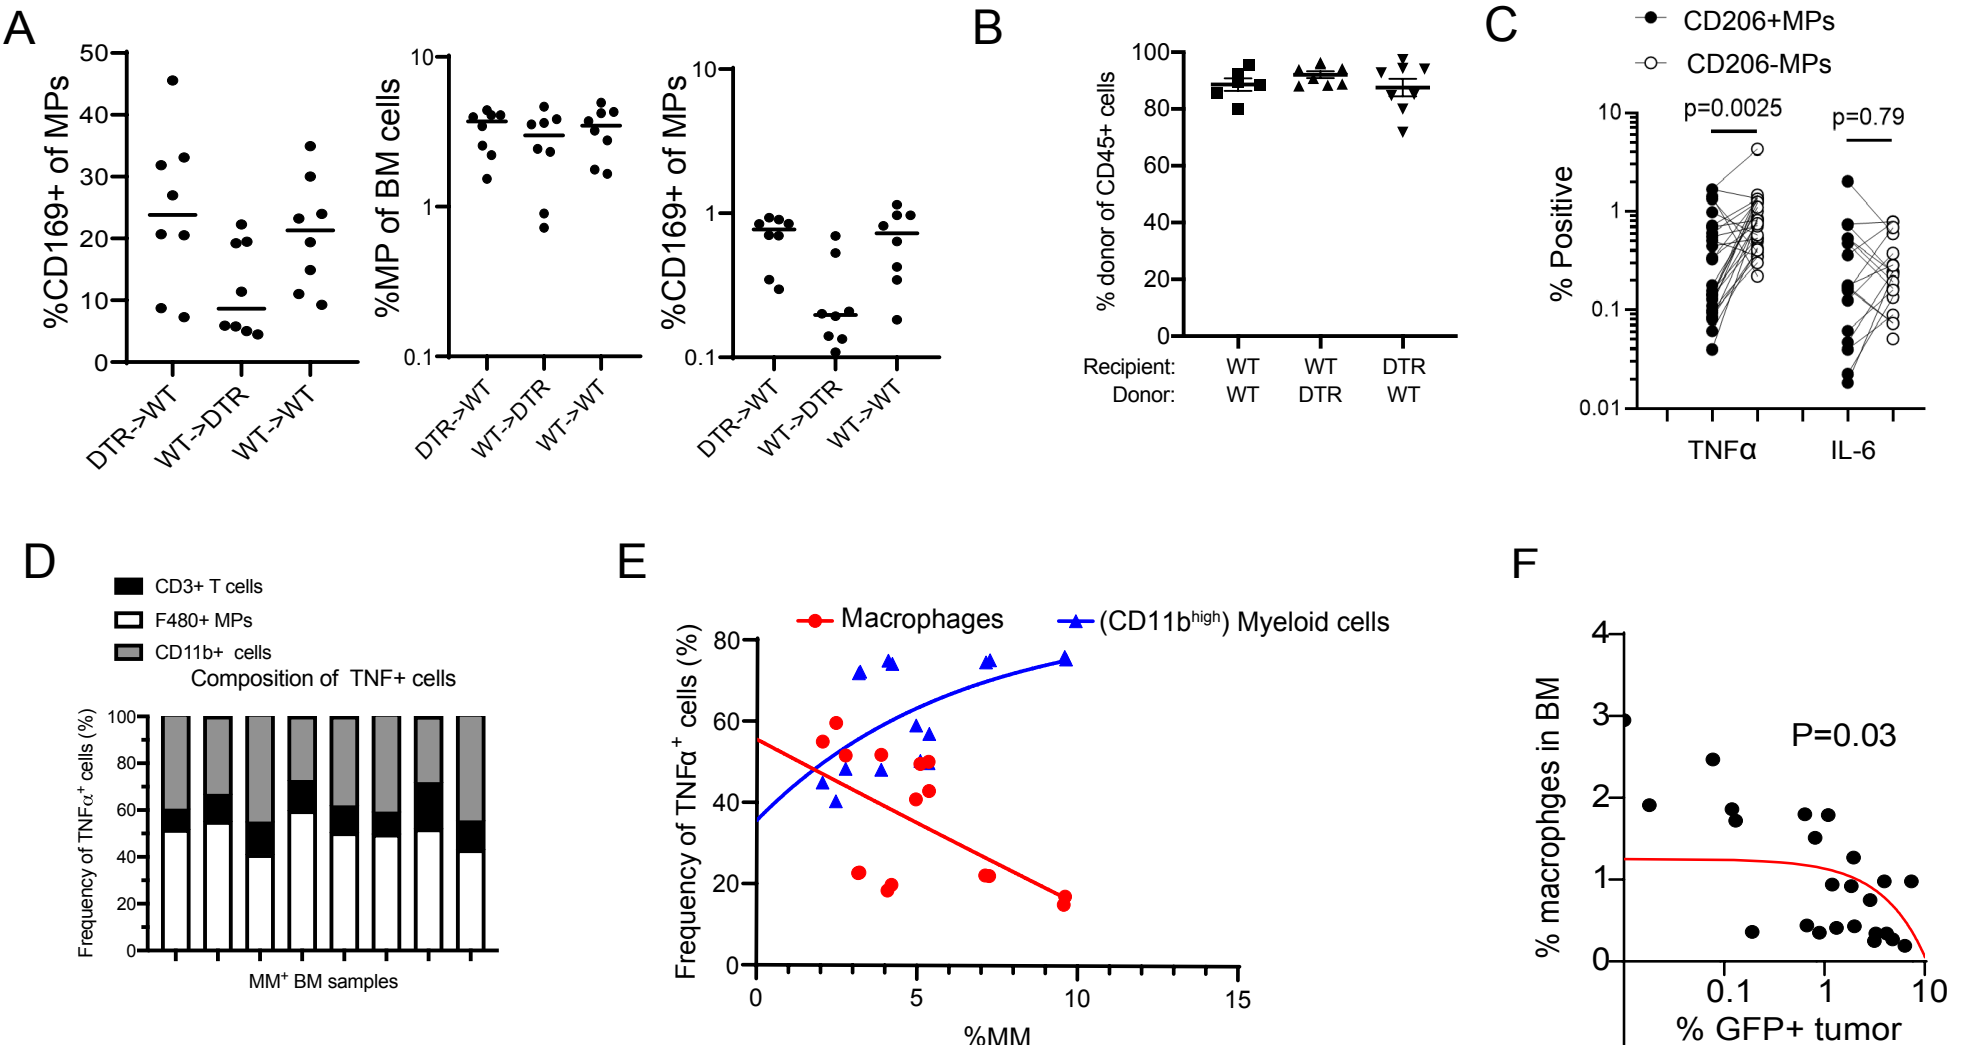

Supplemental Figure 1

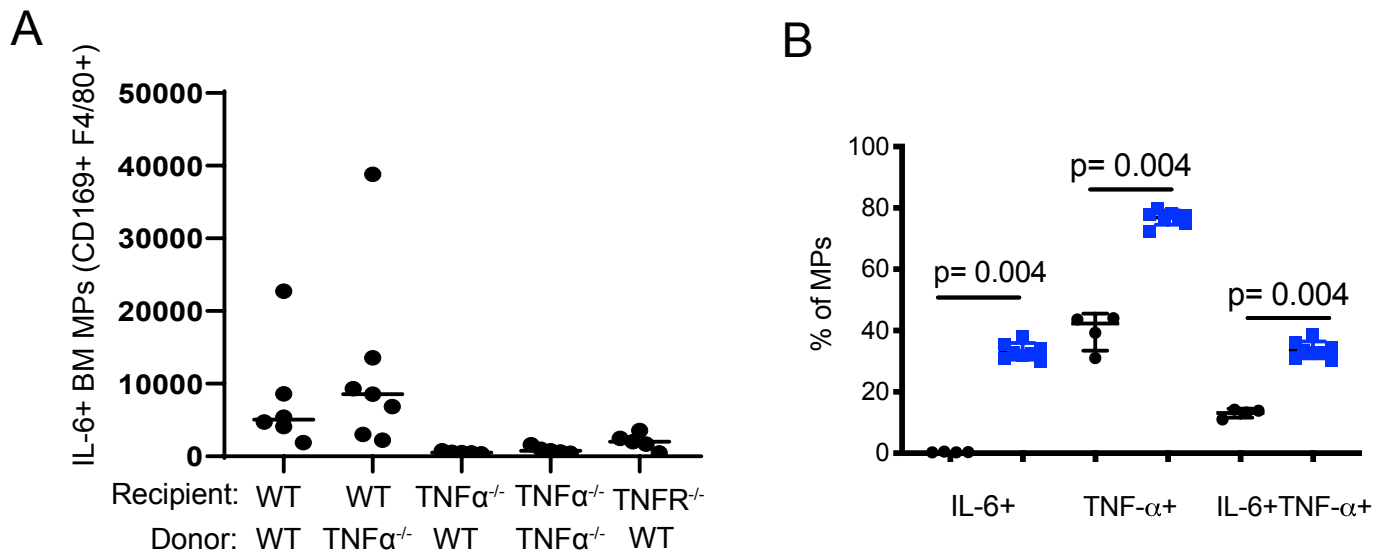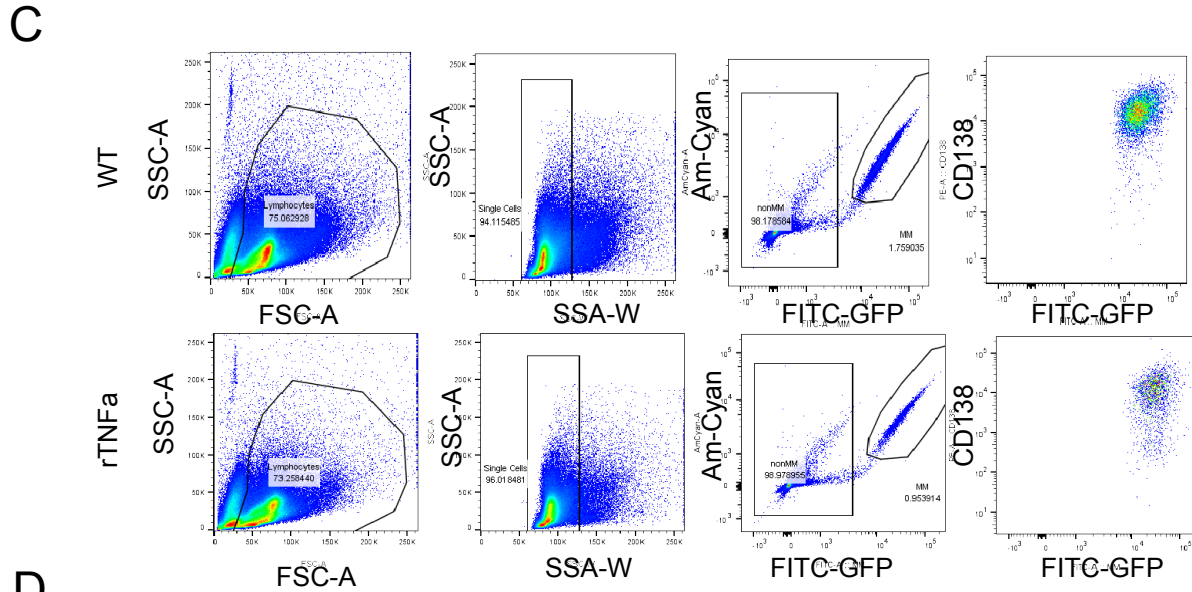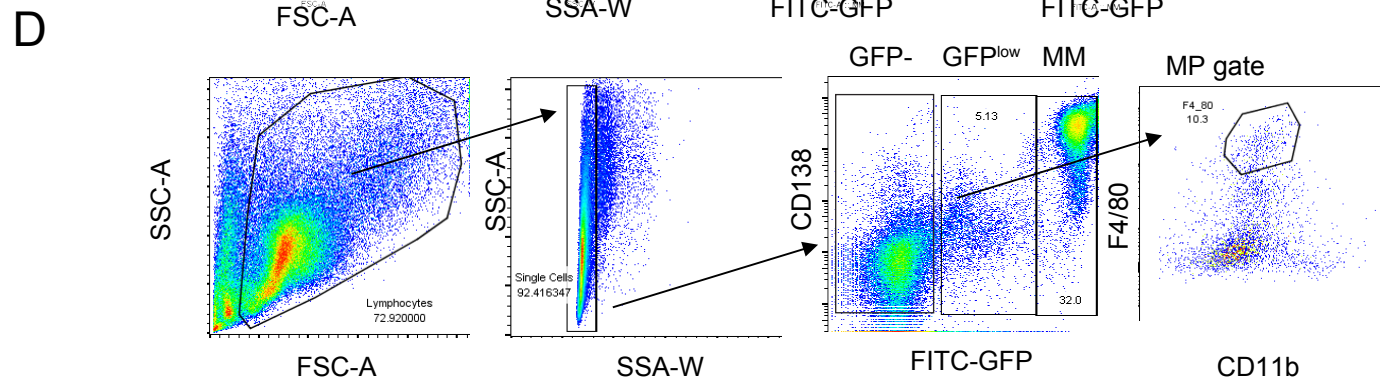

Supplemental Figure 2
